# Supplementary material for: Distinct transcriptomic and epigenomic modalities underpin human memory T cell subsets and their activation potential
Source: PubMed Central journal article supplement (PMC10070634; doi:10.1038/s42003-023-04747-9), 2023-04-03
Supplement: 42003_2023_4747_MOESM1_ESM.pdf [file 42003_2023_4747_MOESM1_ESM.pdf]

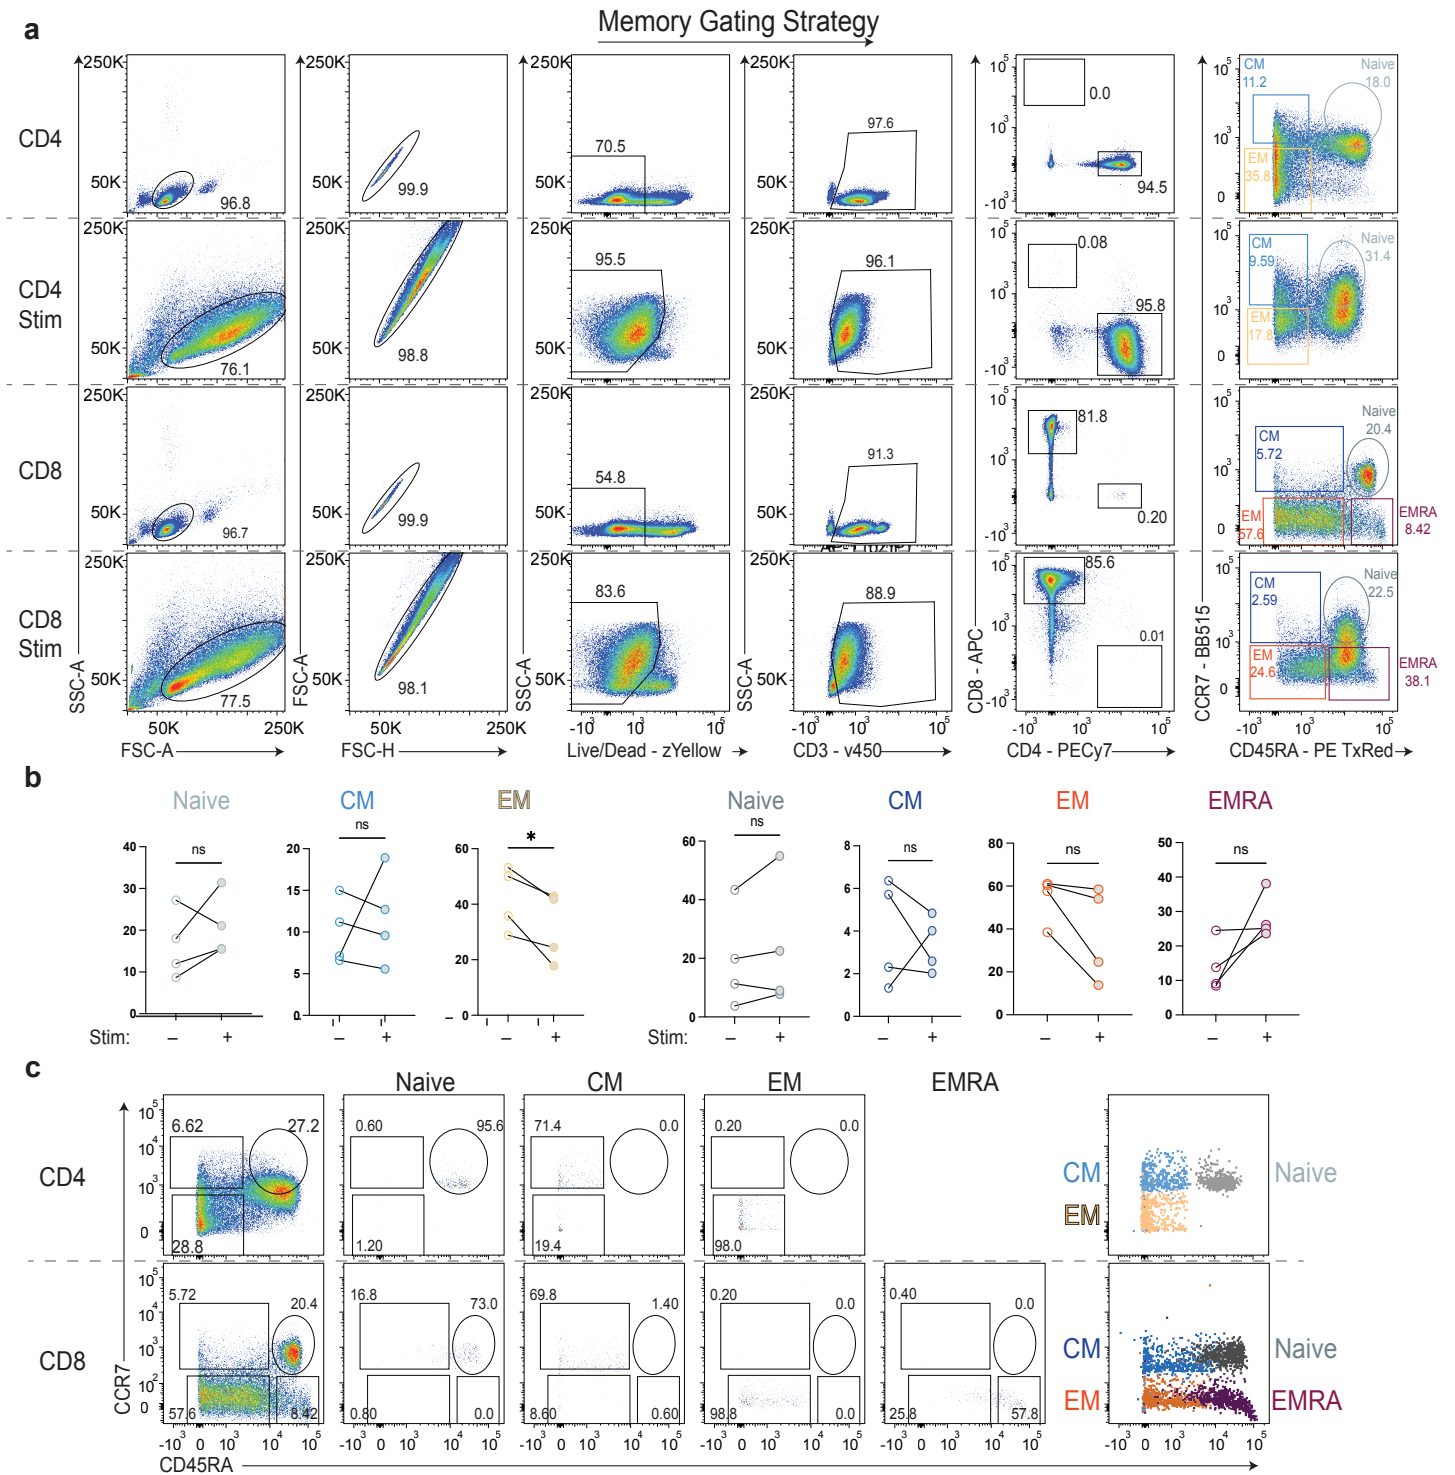

**Supplemental Figure 1. (a)** Representative flow cytometry plots showing gating strategy used to sort CD4<sup>+</sup> (top two rows) and CD8<sup>+</sup> (bottom two rows) memory cells T cells. **(b)** Frequency of MTC subsets in resting and stimulated samples for CD4<sup>+</sup> (left) and CD8<sup>+</sup> (right) T cells (\**p* < 0.05, paired t-test). **(c)** Post-sort analysis, including overlaid CCR7 by CD45RA scatter (last column), of MTC subsets depicting purity of sorted populations.

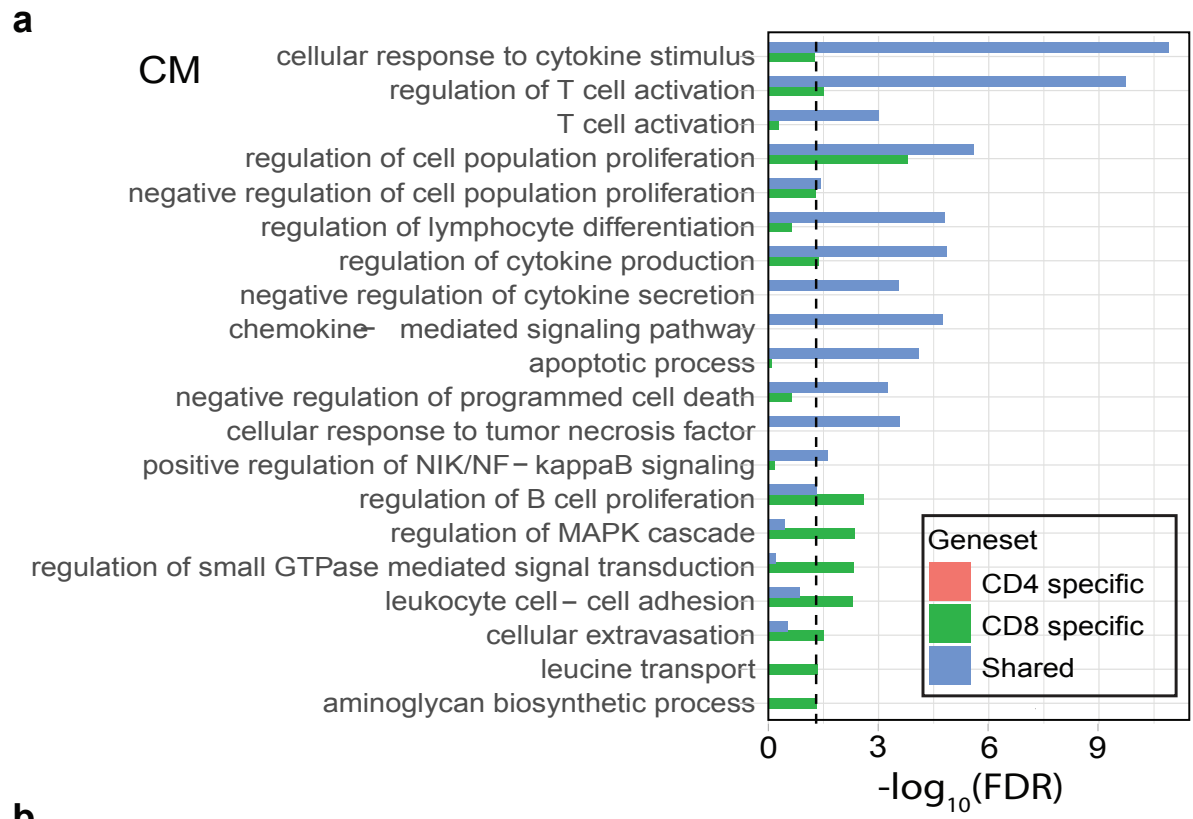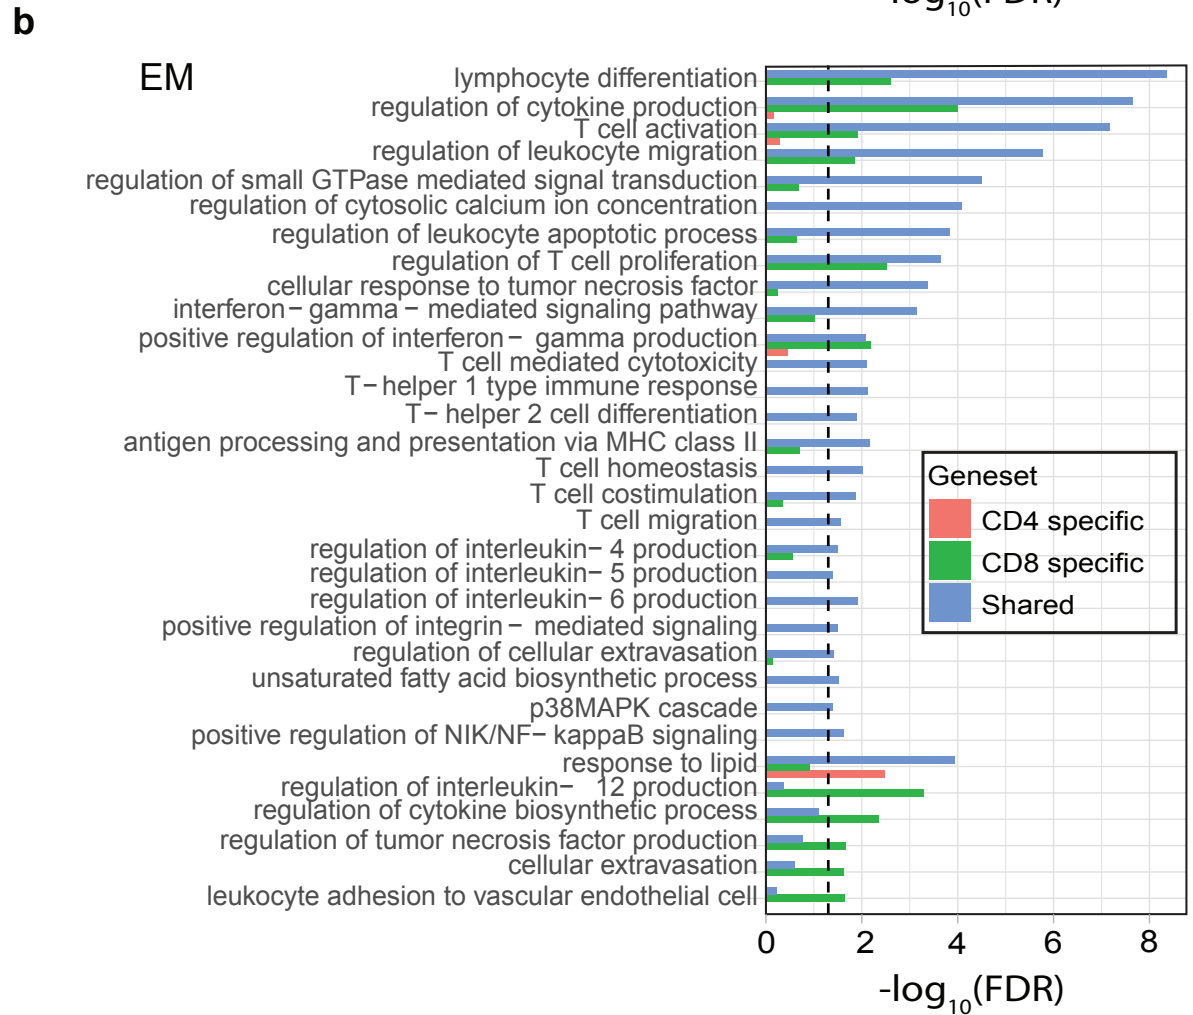

**Supplemental Figure 2. (a)** Bar plot showing FDR-corrected p-value of enriched gene ontology pathways representing CD4+ specific, CD8+ specific and shared DEGs for TCM. Significant enrichment level marked with dotted line. **(b)** Same as A for TEM.

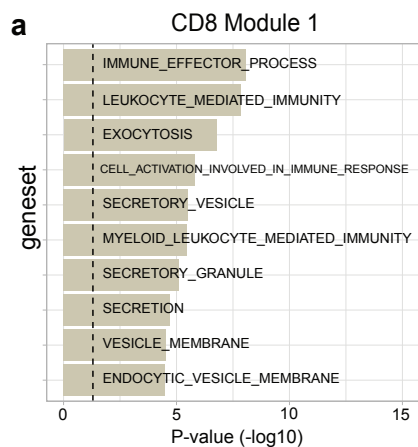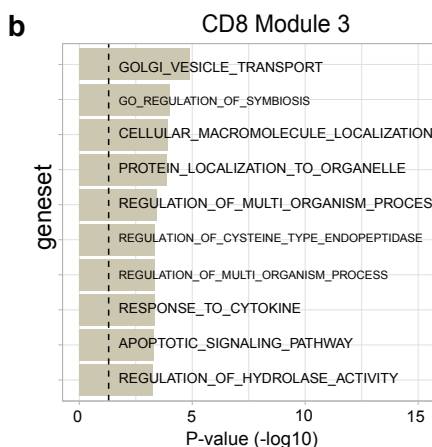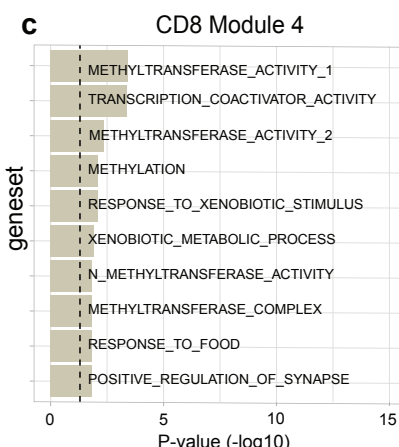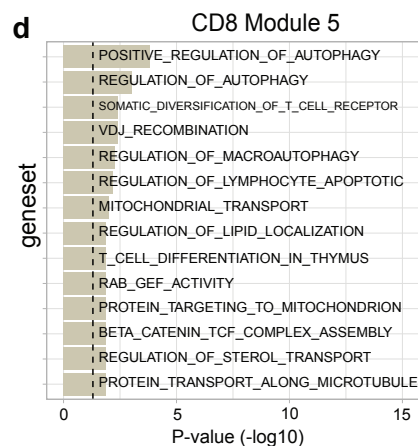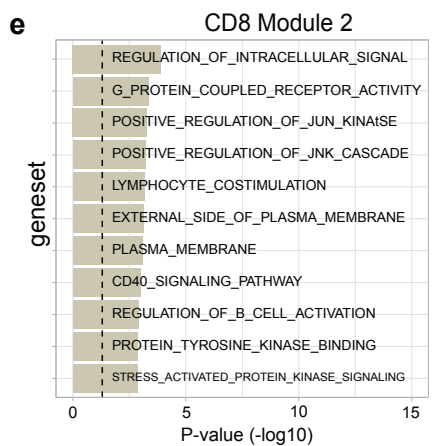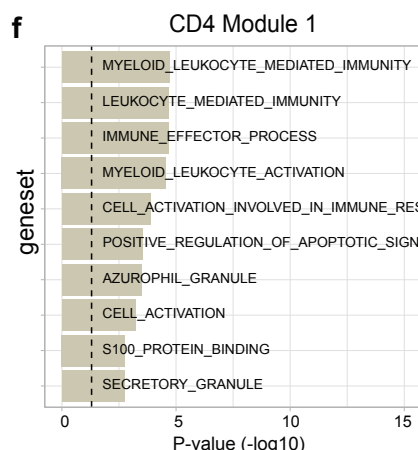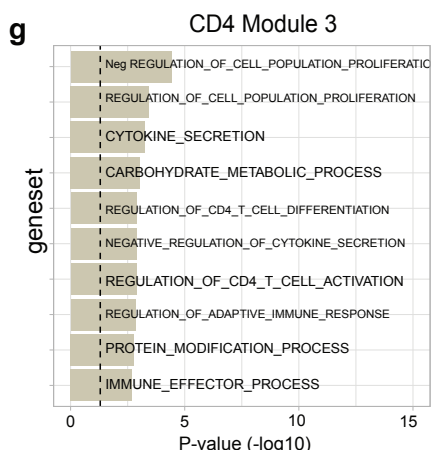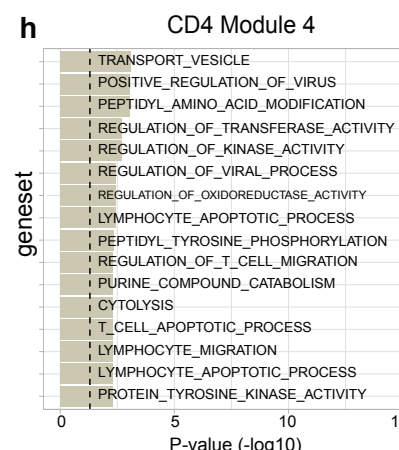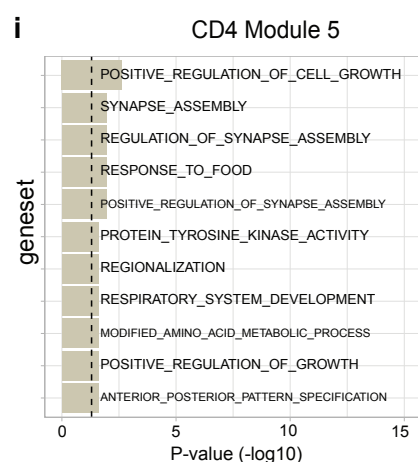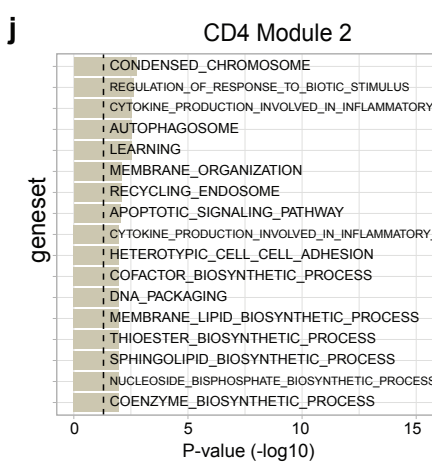

**Supplemental Figure 3. (a-e)** Bar plots showing FDR-corrected p-value of enriched gene ontology pathways for individual gene modules as labeled in CD8+ T cells. Significant enrichment level marked with dotted line. **(f-j)** CD4+ T cells.

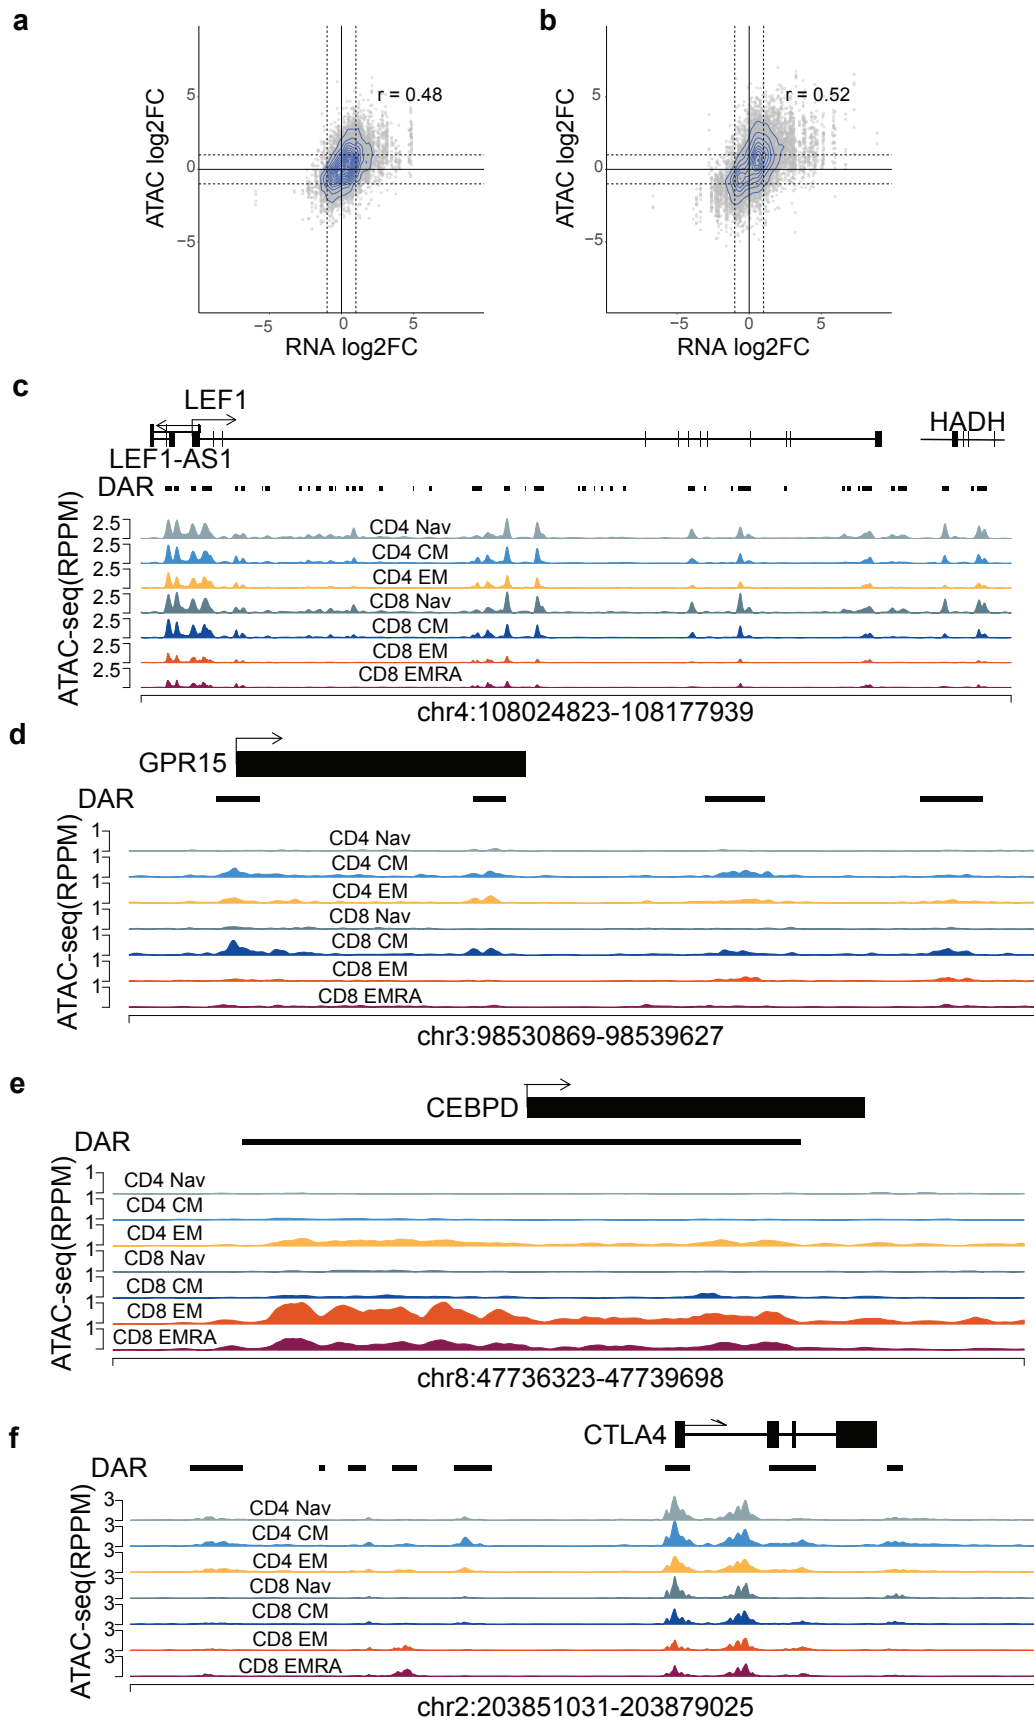

**Supplemental Figure 4.** (a) Scatter plot showing intersection of DEG and DAR for CD4+ TCM. Dotted lines represent  $\pm 1$  log<sub>2</sub>FC. (b) Same as (a) for CD4+ TEM. (c-f) Genome plots showing the average accessibility levels in each of the memory subsets and naïve T cells at the indicated locus. Data represent the mean of each cell type. DAR are highlighted by black boxes at the top of plots.

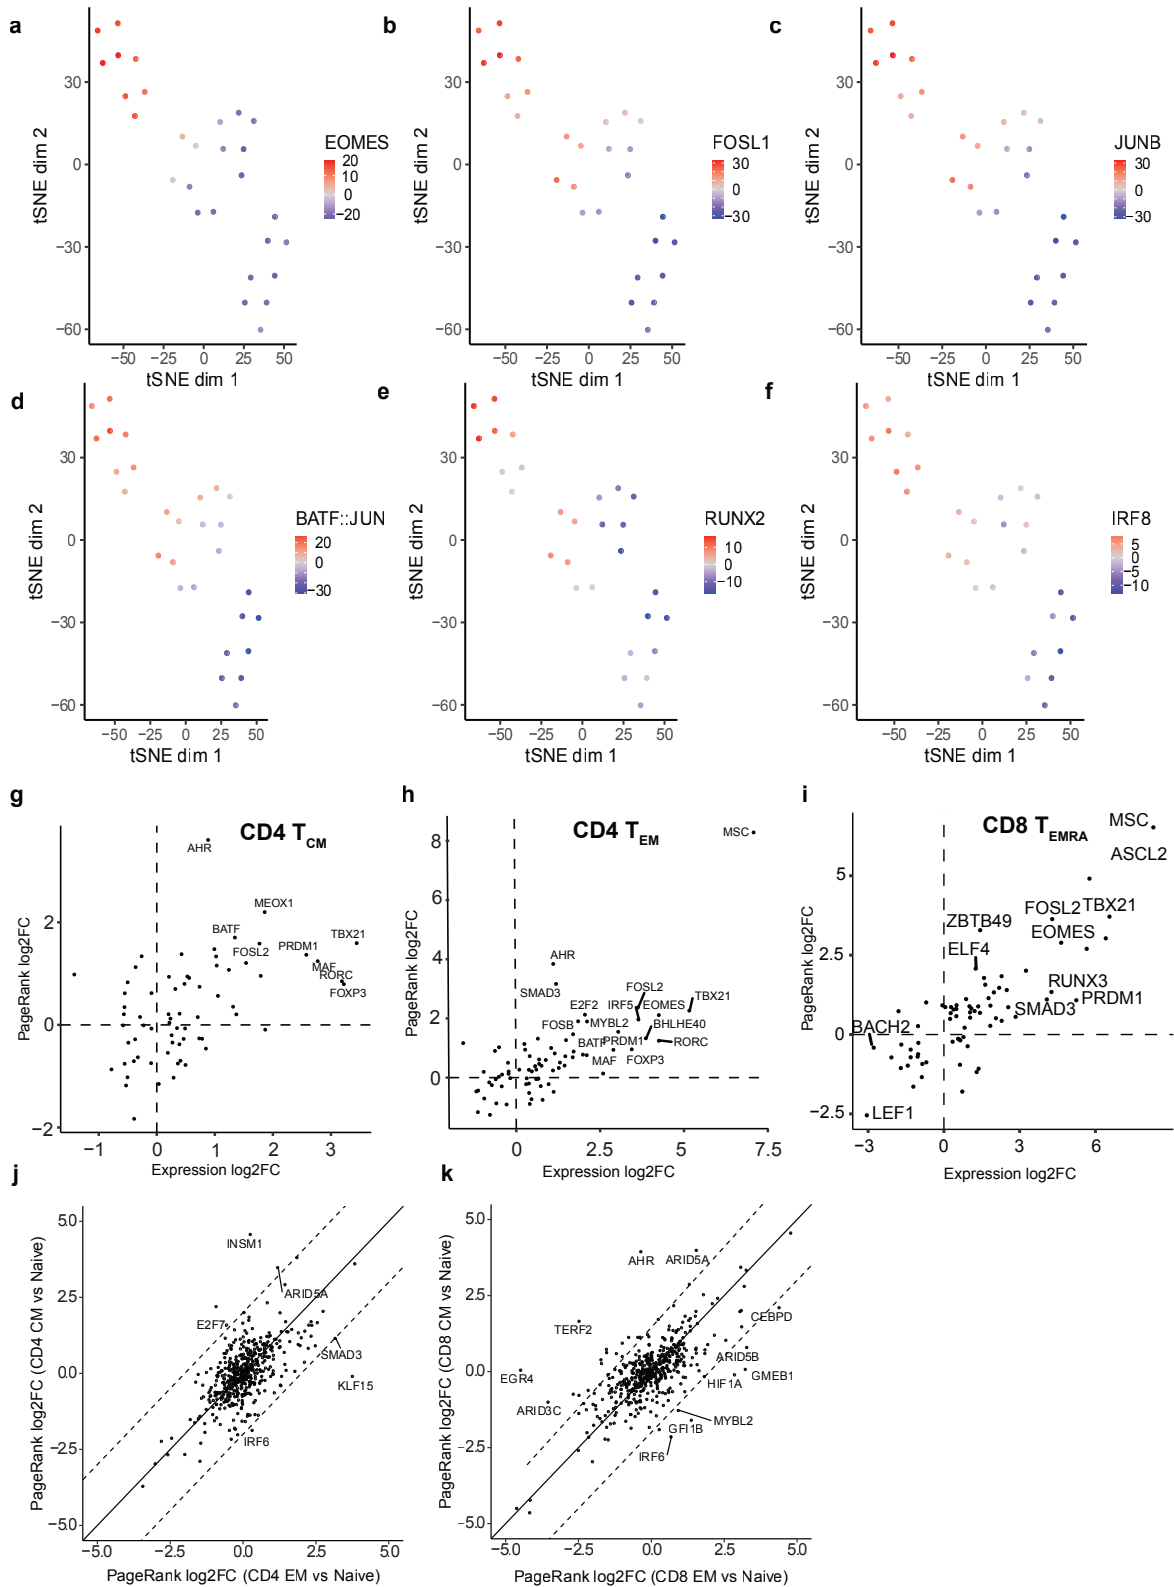

**Supplemental Figure 5.** (a-f) tSNE plot from Figure 5b colored by variability around indicated binding motifs. (g-i) Scatter plots showing log<sub>2</sub> fold changes (log<sub>2</sub>FC) of RNA expression (x-axis) and PageRank statistic log<sub>2</sub>FC (y-axis) between memory and naïve samples for labeled CD8+ memory subsets. (j-k) Scatter plots of log<sub>2</sub>FC PageRank statistic (vs Naive) for TEM (x-axis) vs TCM (y-axis) in CD4+ (j) and CD8+ (k). Solid line represents unity line. Dotted lines represent 1 log<sub>2</sub>FC away from unity.

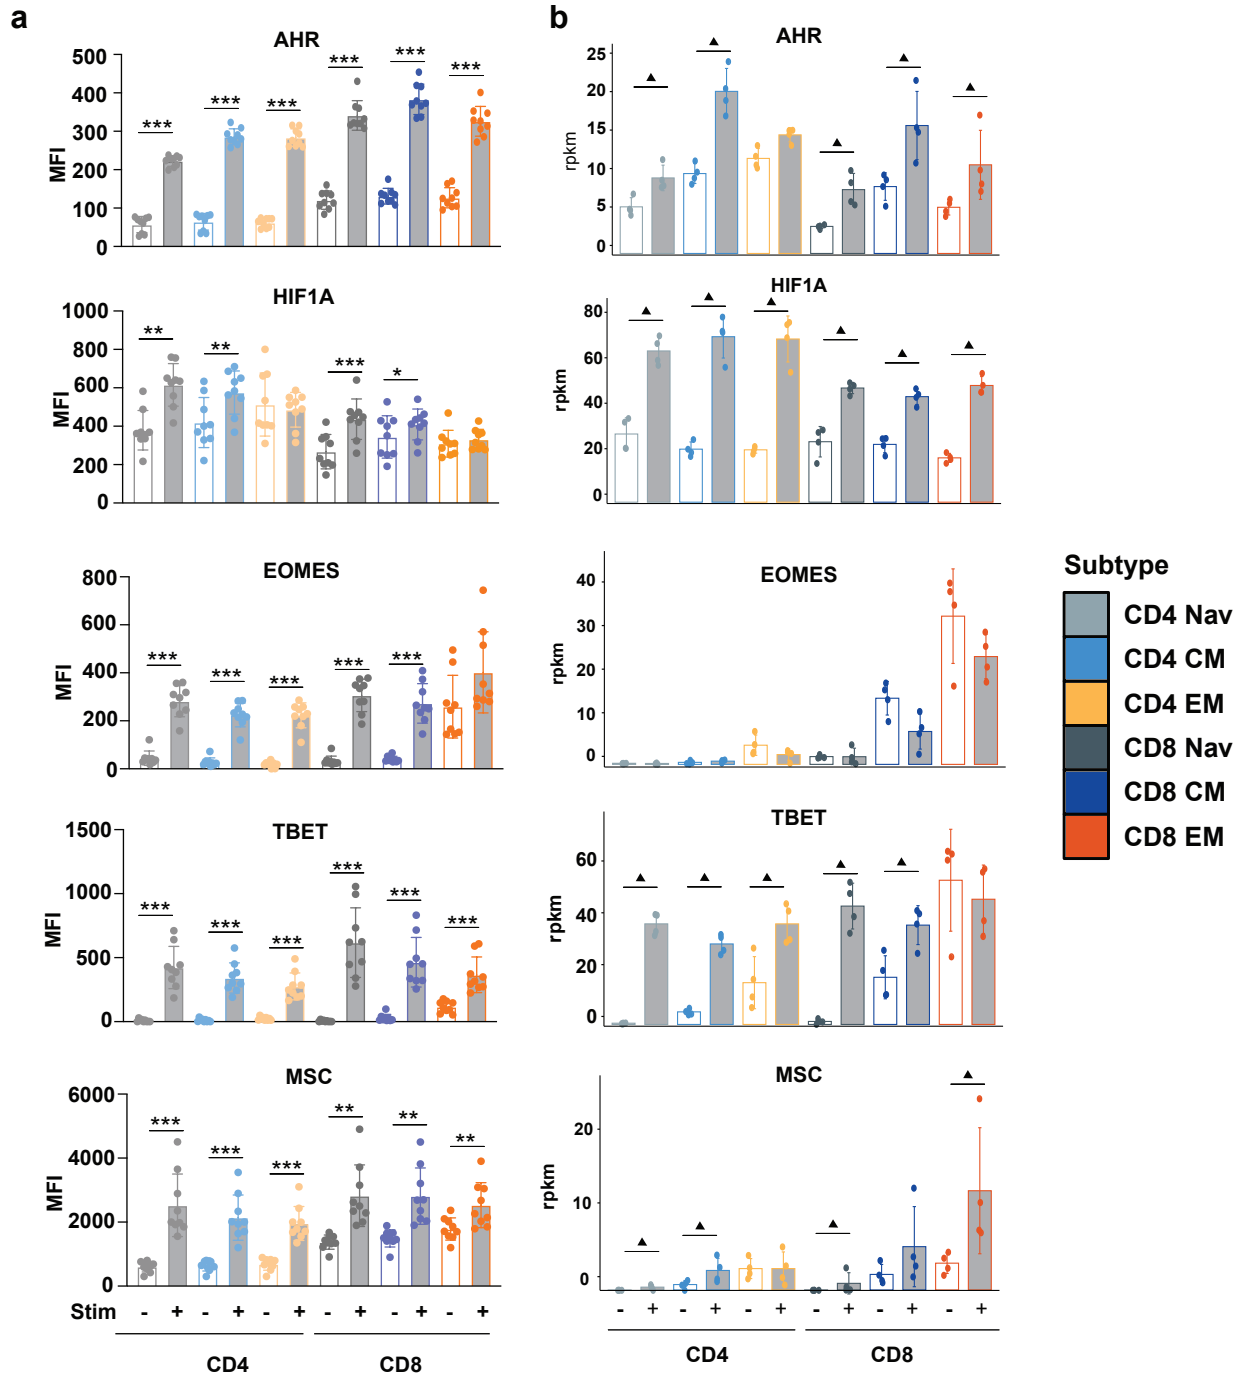

**Supplemental Figure 6. (a)** Median fluorescence intensity (MFI) of corresponding transcription factors in unstimulated and stimulated MTC measured by intracellular staining and flow cytometry. Isotype controls subtracted as background. N=9, \*P<0.05, \*\*P<0.01, \*\*\*P<0.001. Paired t-test was performed. **(b)** RNA expression data of the transcription factors for MTC subsets unstimulated and stimulated expressed as reads per kilobase million (rpkm). Statistical analyses were performed using DEseq2. N=4, ▲, FDR < 0.05 and log2FC > 1.

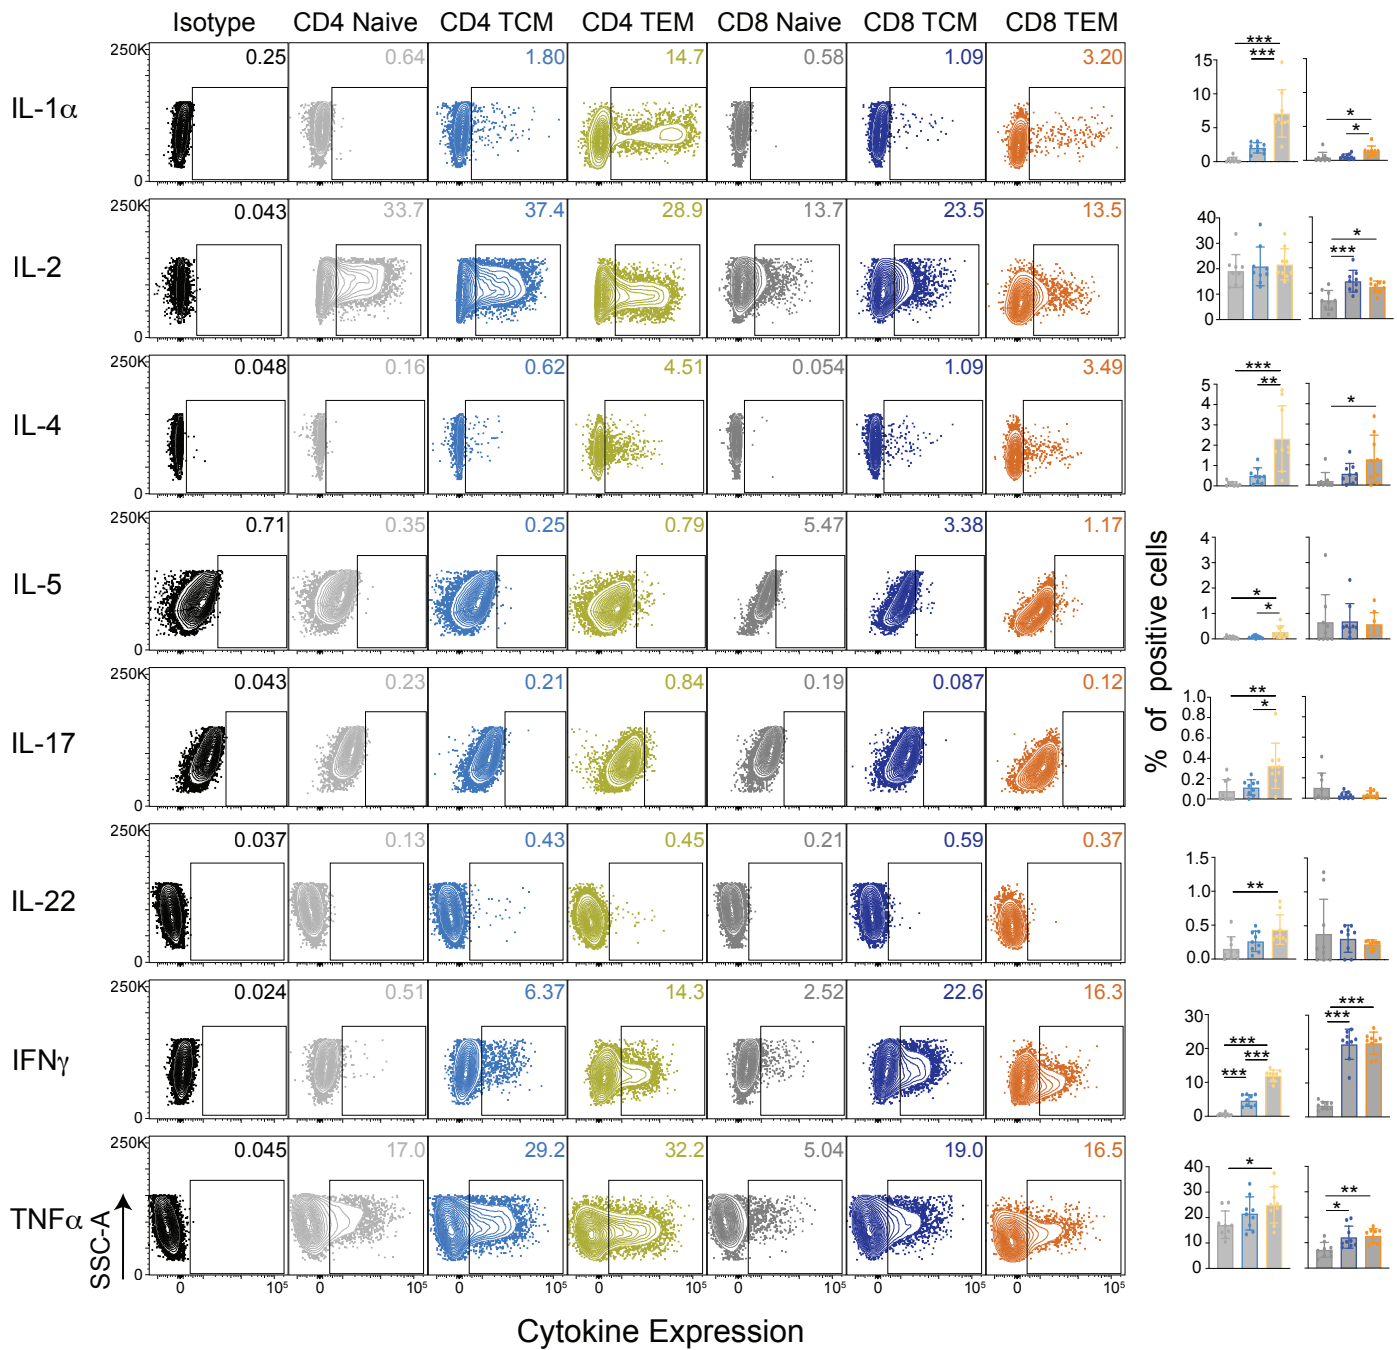

**Supplemental Figure 7.** Cytokines expression was measured in stimulated T cells by intracellular staining and flow cytometry. Left, representative flow cytometry plots showing data and gating strategy. Right, bar plots showing the frequency of the cells that express the corresponding cytokine. N=9, \*P<0.05, \*\*P<0.01, \*\*\*P<0.001. One way ANOVA, multiple comparisons was performed to determine significant differences.

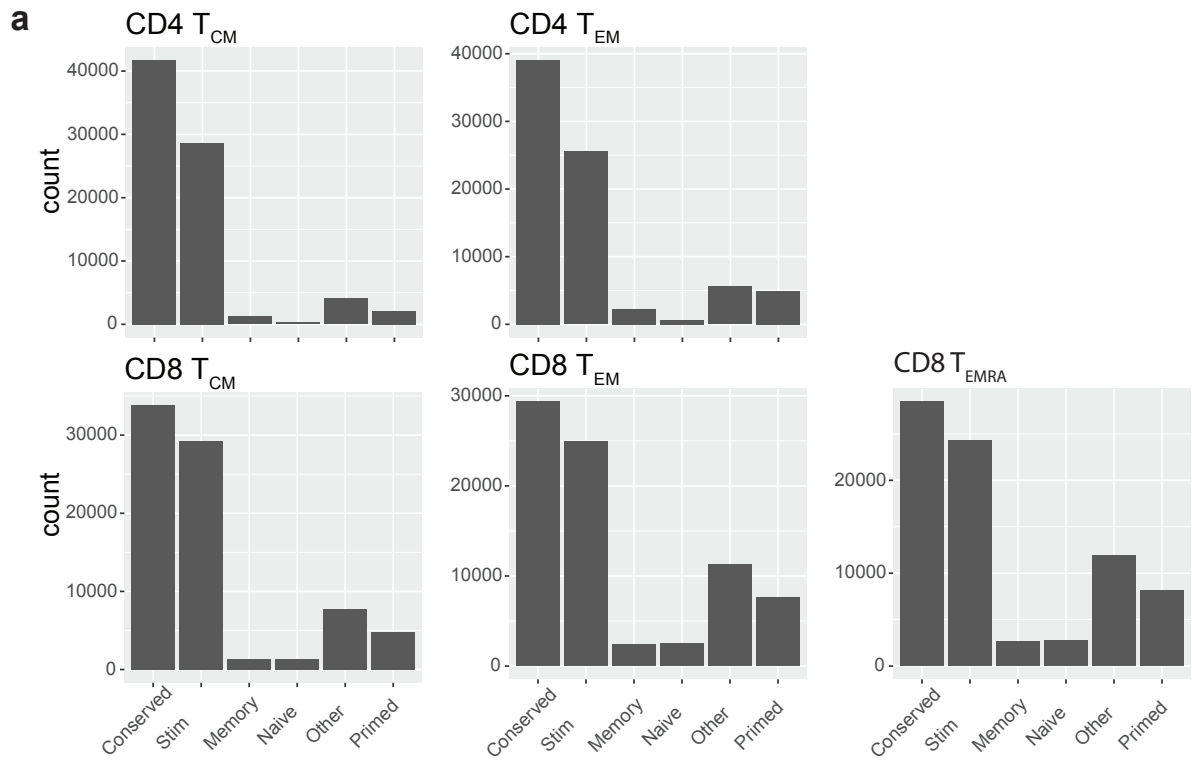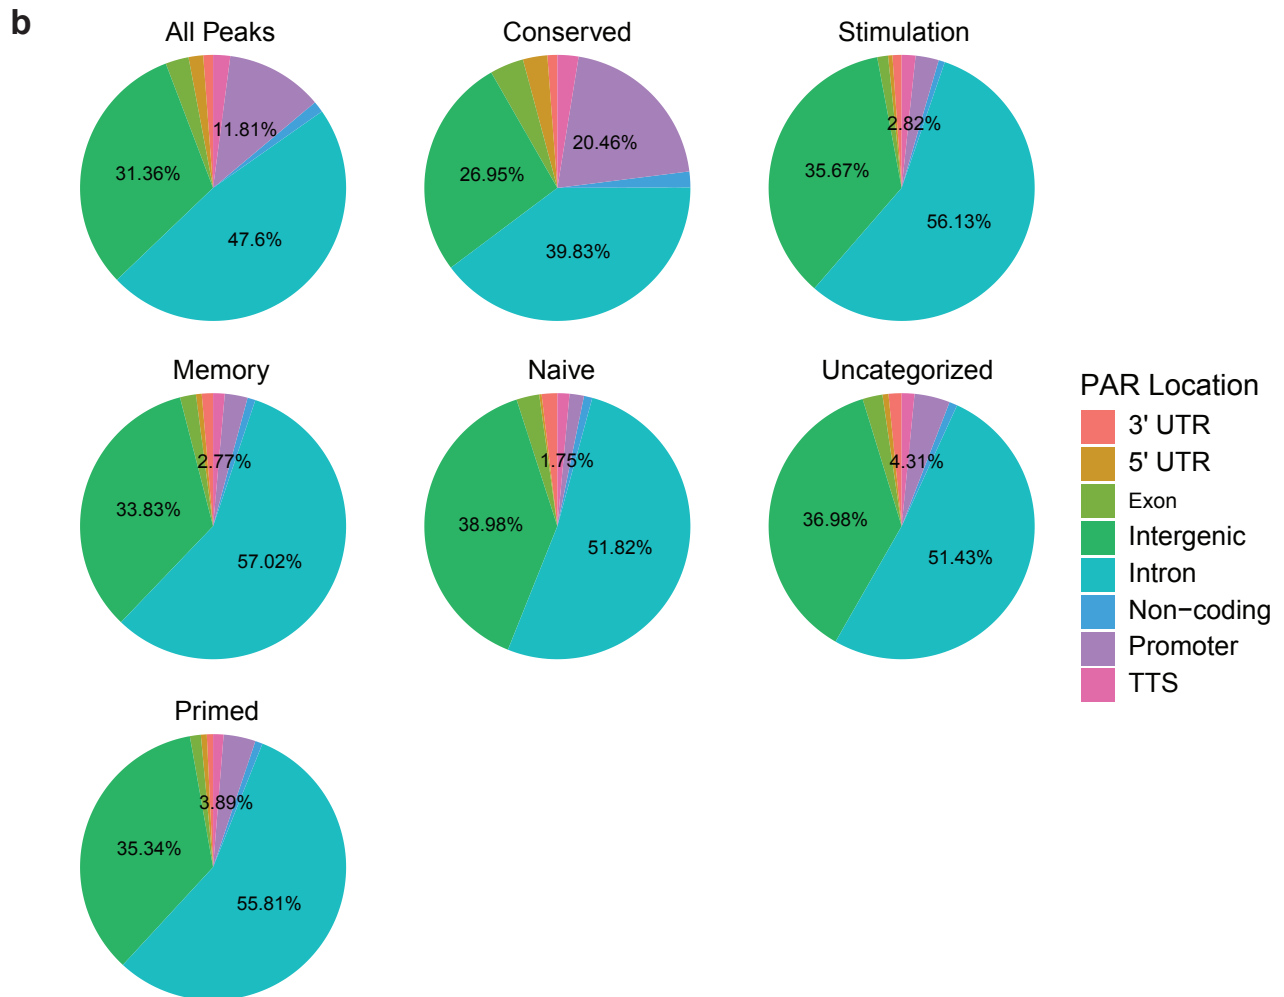

**Supplemental Figure 8. (a)** Histograms of counts for PAR categories for indicated MTC subsets. **(b)** Pie charts for indicated PAR categories showing percentages of genomic annotations associated with each.



a

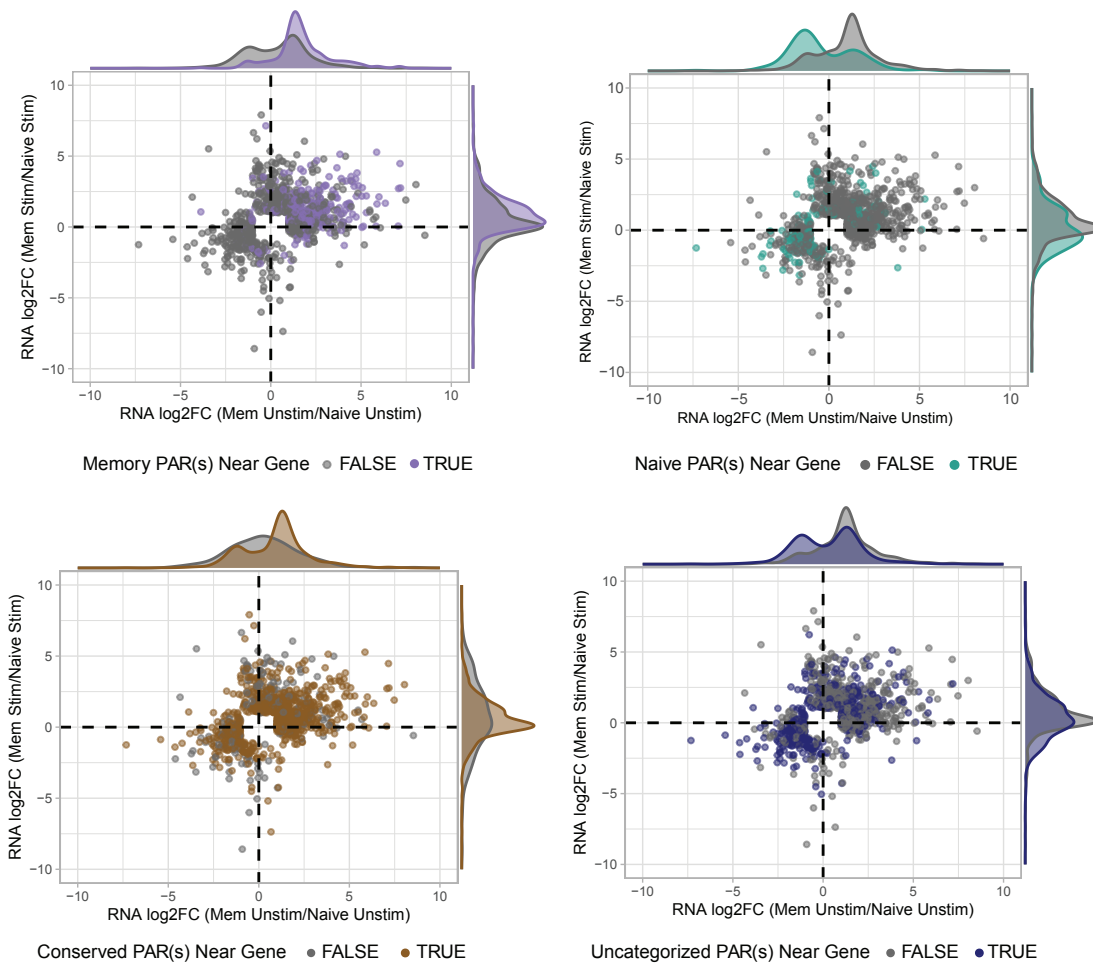

b

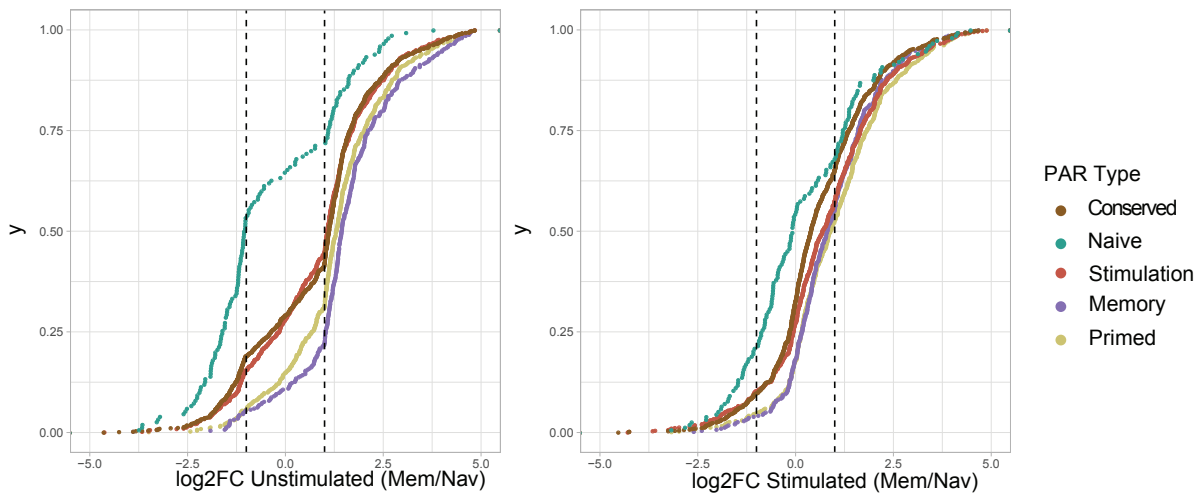

**Supplemental Figure 9.** (a) Scatter plot showing log<sub>2</sub>-transformed fold changes (log<sub>2</sub>FC) for DEG found to be significant in either unstimulated memory vs unstimulated naïve T cells (x-axis) or stimulated memory vs stimulated naïve T cells (y-axis). Dots are colored in respective colors if there is at least one PAR mapped to differential gene locus. (b) Empirical cumulative distribution function plots for unstimulated DEG (left) and stimulated DEG (right) colored by presence of different PAR categories.

| <b>Supplementary Table 1: List of Antibodies</b> |                    |                       |                 |                                   |
|--------------------------------------------------|--------------------|-----------------------|-----------------|-----------------------------------|
| <b>Antibody Name</b>                             | <b>Fluorophore</b> | <b>Catalog Number</b> | <b>Company</b>  | <b>Used Concentration (µg/mL)</b> |
| CD3                                              | BV605              | 300459                | Biolegend       | 1.3                               |
| CD3                                              | BV650              | 317324                | Biolegend       | 0.2                               |
| CD3                                              | BV450              | 75-0037-T100          | Tonbo           | 1.3                               |
| CD4                                              | BV711              | 344648                | Biolegend       | 1.3                               |
| CD4                                              | BV785              | 317441                | Biolegend       | 1                                 |
| CD4                                              | PE/Cyanine7        | 344612                | Biolegend       | 1.3                               |
| CD4                                              | PE/Cyanine7        | 300511                | Biolegend       | 10                                |
| CD8                                              | APC/Cyanine7       | 344714                | Biolegend       | 1.3                               |
| CD8                                              | AF488              | MHCD0801              | Thermofisher    | 0.2                               |
| CCR7                                             | APC                | 353213                | Biolegend       | 2.6                               |
| CCR7                                             | AF488              | 353206                | Biolegend       | 5                                 |
| CCR7                                             | BB515              | 565870                | BD Biosciences  | 10                                |
| CD45RA                                           | AF700              | 560673                | BD Biosciences  | 1.3                               |
| CD45RA                                           | BV650              | 740608                | BD Biosciences  | 2.6                               |
| CD45RA                                           | PE/TxRed           | 304145                | Biolegend       | 2                                 |
| MSC Polyclonal                                   |                    | PA5-118504            | Thermofisher    | 10                                |
| Rabbit Polyclonal Isotype Ctrl                   |                    | 910801                | Biolegend       | 10                                |
| Donkey anti-rabbit IgG                           | PE                 | 406421                | Biolegend       | 0.87                              |
| AHR                                              | PE/Cyanine7        | 25-9854-42            | Thermofisher    | 2                                 |
| Mouse IgG2b, κ Isotype Ctrl                      | PE/Cyanine7        | 25-4732-81            | Thermofisher    | 2                                 |
| HIF-1 alpha                                      | APC                | IC1935A               | R&D Sysytems    | 0.2                               |
| Mouse IgG1 Isotype Ctrl                          | APC                | IC002A                | R&D Sysytems    | 0.2                               |
| T-bet                                            | BV421              | 644815                | Biolegend       | 1.2                               |
| Mouse IgG1, κ Isotype Ctrl                       | BV21               | 400157                | Biolegend       | 1.2                               |
| EOMES                                            | PE-Cyanine5.5      | 35-4877-42            | Thermofisher    | 1                                 |
| Mouse IgG1, κ Isotype Ctrl                       | PE-Cyanine5.5      | 35-4714-82            | Thermofisher    | 1                                 |
| Puromycin                                        | AF647              | MABE343-AF647         | Millipore Sigma | 0.45                              |
| IL-1α                                            | PE                 | 500106                | Biolegend       | 0.8                               |
| Mouse IgG1, κ Isotype Ctrl                       | PE                 | 400111                | Biolegend       | 0.8                               |
| IL-4                                             | APC                | 500812                | Biolegend       | 0.25                              |
| Rat IgG1, κ Isotype Ctrl                         | APC                | 400411                | Biolegend       | 0.25                              |
| IL-2                                             | PE/Cyanine7        | 500326                | Biolegend       | 0.5                               |
| Rat IgG2a, κ Isotype Ctrl                        | PE/Cyanine7        | 400521                | Biolegend       | 0.5                               |
| IL-5                                             | eFluour 450        | 48-7052-82            | Thermofisher    | 4                                 |
| Rat IgG1, κ Isotype Ctrl                         | eFluour 450        | 48-4301-80            | Thermofisher    | 4                                 |
| IFN-γ                                            | BV711              | 502539                | Biolegend       | 1                                 |
| Mouse IgG1, κ Isotype Ctrl                       | BV711              | 400167                | Biolegend       | 1                                 |
| TNF-α                                            | BV650              | 502937                | Biolegend       | 2                                 |
| Mouse IgG1, κ Isotype Ctrl                       | BV650              | 400163                | Biolegend       | 2                                 |
| IL-22                                            | BUV737             | 367-7229-42           | Thermofisher    | 1                                 |
| Mouse IgG1, κ Isotype Ctrl                       | BUV737             | 367-4714-81           | Thermofisher    | 1                                 |
| IL-17/IL-17A                                     | PerCP              | IC3171C-025           | R&D systems     | 1                                 |
| Mouse IgG1, Isotype Ctrl                         | PerCP              | IC002C                | R&D systems     | 1                                 |
