# Supplementary material for: Distinct transcriptomic and epigenomic modalities underpin human memory T cell subsets and their activation potential
Source: PubMed Central journal article supplement (PMC10070634; doi:10.1038/s42003-023-04747-9), 2023-04-03
Supplement: 42003_2023_4747_MOESM2_ESM.pdf [file 42003_2023_4747_MOESM2_ESM.pdf]

## Description of Additional Supplementary Files

**File name:** Supplemental Data 1

**Description:** Differentially expressed Genes.

**File name:** Supplemental Data 2

**Description:** Clustering modules for CD8 T cells.

**File name:** Supplemental Data 3

**Description:** Clustering modules for CD4 T cells.

**File name:** Supplemental Data 4

**Description:** Differentially Accessible Regions.

**File name:** Supplemental Data 5

**Description:** Patterned accessibility regions classifications.
